# Supplementary material for: Increased Levels of miR-15b-5p and miR-20b-5p in Pancreatic Ductal Adenocarcinoma with Hepatic Metastases
Source: MDPI journal article supplement (doi:10.3390/genes14081577), 2023-08-02
Supplement: s1 [file s1]

**Supplementary Table S3:** Significantly dysregulated miRNAs in the comparison PDAC vs CTRL in our study and results obtained in similar studies reported in dbDEMC (<https://www.biosino.org/dbDEMC/index>)

|             | Ou results |          | dbDEMC<br>EXP00134 | dbDEMC<br>EXP00137 | dbDEMC<br>EXP00248 | dbDEMC<br>EXP00249 | dbDEMC<br>EXP00416  | dbDEMC<br>EXP00595 |
|-------------|------------|----------|--------------------|--------------------|--------------------|--------------------|---------------------|--------------------|
| miRNA       | FC*        | p-value# | 5PDAC<br>vs 4 NT   | 25 PDAC<br>vs 7 NT | 9 PDAC<br>vs 9 NT  | 7 PDAC<br>vs 5 NT  | 178 PDAC<br>vs 4 NT | 12 PDAC<br>vs 3 NT |
| miR-205-5p  | 87.35      | 0.006    |                    |                    |                    |                    |                     |                    |
| miR-15b-5p  | 11.6       | <0.001   | Up                 |                    |                    |                    |                     |                    |
| miR-93-5p   | 8.84       | 0.001    |                    |                    |                    | Up                 |                     |                    |
| let-7i-5p   | 8.02       | 0.01     |                    |                    | Up                 |                    |                     |                    |
| miR-20a-5p  | 7.59       | <0.001   |                    |                    |                    |                    |                     |                    |
| miR-18a-5p  | 7.55       | <0.001   | Up                 |                    |                    |                    |                     |                    |
| miR-20b-5p  | 7.42       | <0.001   |                    |                    |                    |                    |                     |                    |
| miR-17-5p   | 7.12       | <0.001   | Up                 |                    |                    | Up                 |                     |                    |
| miR-16-5p   | 6.96       | <0.001   |                    |                    |                    |                    |                     |                    |
| miR-106a-5p | 6.1        | 0.001    |                    |                    |                    |                    |                     |                    |
| miR-106b-5p | 6.09       | <0.001   | Up                 |                    |                    | Up                 |                     | Up                 |
| miR-15a-5p  | 4.78       | 0.004    | Up                 |                    |                    |                    |                     |                    |
| miR-223-3p  | 4.61       | <0.001   |                    |                    | Up                 |                    |                     |                    |
| miR-31-5p   | 4.09       | 0.001    |                    |                    | Up                 |                    |                     | Up                 |
| miR-107     | 3.53       | 0.011    | Up                 |                    | Up                 |                    |                     |                    |
| miR-103a-3p | 3.1        | 0.012    |                    |                    |                    |                    |                     |                    |
| miR-25-3p   | 2.66       | 0.015    |                    |                    |                    |                    |                     |                    |
| miR-222-3p  | 2.52       | 0.02     | Up                 | Up                 | Up                 |                    |                     | Up                 |
| miR-221-3p  | 2.46       | 0.009    |                    |                    | Up                 |                    |                     | Up                 |
| miR-210-3p  | 1.6        | 0.003    | Up                 |                    |                    | Up                 |                     | Up                 |
| miR-27b-3p  | 0.5        | 0.001    |                    |                    |                    |                    |                     | Down               |

|             |      |        |      |    |    |      |      |      |
|-------------|------|--------|------|----|----|------|------|------|
| miR-10b-5p  | 0.42 | 0.03   |      |    | Up |      | Down | Up   |
| miR-195-5p  | 0.41 | 0.004  |      |    |    |      |      |      |
| miR-30d-5p  | 0.35 | 0.018  |      |    |    |      |      |      |
| miR-200a-3p | 0.34 | 0.014  | Up   | Up |    |      | Up   |      |
| miR-30b-5p  | 0.34 | 0.03   |      |    |    |      |      | Down |
| miR-200b-3p | 0.34 | <0.001 |      | Up |    |      | Up   |      |
| miR-99a-5p  | 0.28 | 0.002  | Down |    |    |      |      | Up   |
| miR-125b-5p | 0.24 | 0.001  | Down |    | Up |      |      | Up   |
| miR-200c-3p | 0.14 | 0.002  | Up   | Up |    |      | Up   |      |
| miR-141-3p  | 0.12 | 0.003  |      |    |    |      |      | Down |
| miR-7-5p    | 0.1  | 0.002  |      |    |    |      |      |      |
| miR-148a-3p | 0.07 | <0.001 | Down |    |    | Down |      | Down |

\* FC= Fold change

# p-value= Mann Whitney test

Up= adj-p<0.05 and FC≥2

Down= adj-p<0.05 and FC≤0.5
